# Supplementary material for: Novel double-networked polyurethane composites with multi-stimuli responsive functionalities
Source: Royal Society of Chemistry journal article supplement (doi:10.1039/c8ta05969a), 2018-01-01
Supplement: c8ta05969a1.pdf [file c8ta05969a1.pdf]

Supporting information

## Novel Double-Networked Polyurethane Composites with Multi-Stimuli Responsive Functionalities

Chenyang Cai<sup>1</sup>, Zechang Wei<sup>1</sup>, Xing Wang<sup>1</sup>, Changtong Mei<sup>1</sup>, Yu Fu<sup>1</sup>, W. H. Zhong<sup>2</sup>

<sup>1</sup>College of Materials Science and Engineering

Nanjing Forestry University, 159 Longpan Road, Nanjing, Jiangsu, 210037, China

<sup>2</sup>School of Mechanical and Materials Engineering, Washington State University, Pullman, WA 99164, USA

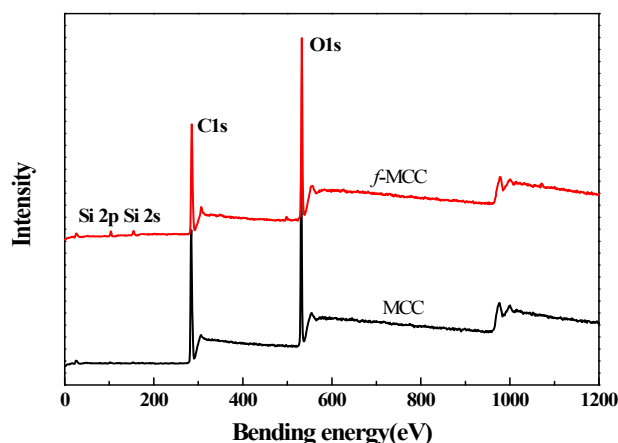

Fig. S1. XPS survey of MCC and *f*-MCC

Table S1. Analysis of C 1s peaks and their relative atomic percentage of MCC and *f*-MCC from XPS

| Sample        | XPS C 1s peaks fitting binding energy (eV; relative atomic percentage, %) |               |               |              |
|---------------|---------------------------------------------------------------------------|---------------|---------------|--------------|
|               | C-C                                                                       | C-H           | C-O           | C-O-C        |
| MCC           | 284.6 (33.67)                                                             |               | 286 (40.83)   | 288.1 (25.5) |
| <i>f</i> -MCC | 284.6 (25.47)                                                             | 285.1 (13.88) | 286.3 (46.75) | 288.3 (13.9) |

(a)

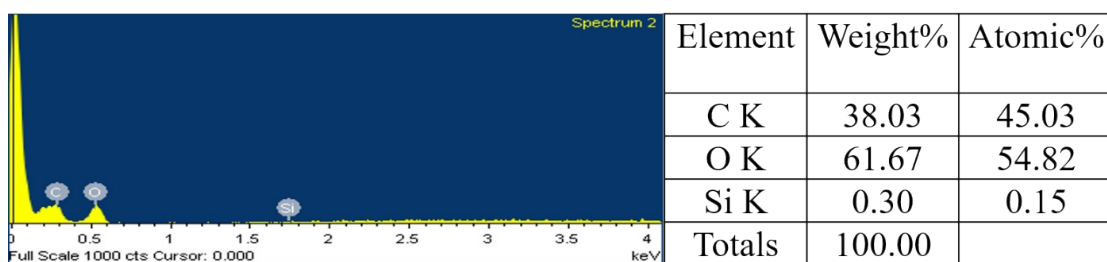

(b)

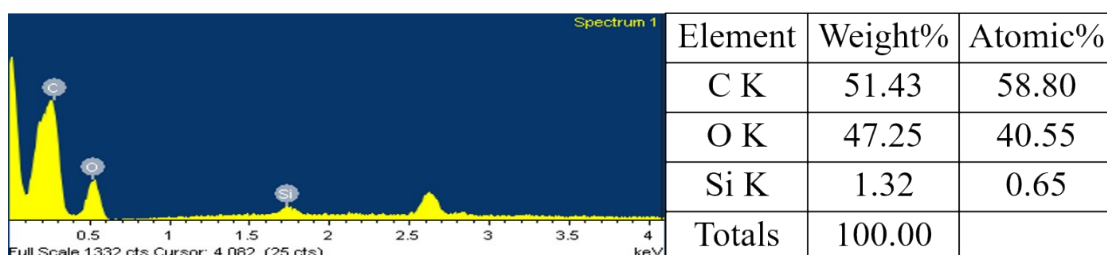

Fig. S2. EDS curves of MCC and *f*-MCC: (a) *f*-MCC with conventional agent and (b) *f*-MRPUs with ionic

liquid solution

## Thermal properties

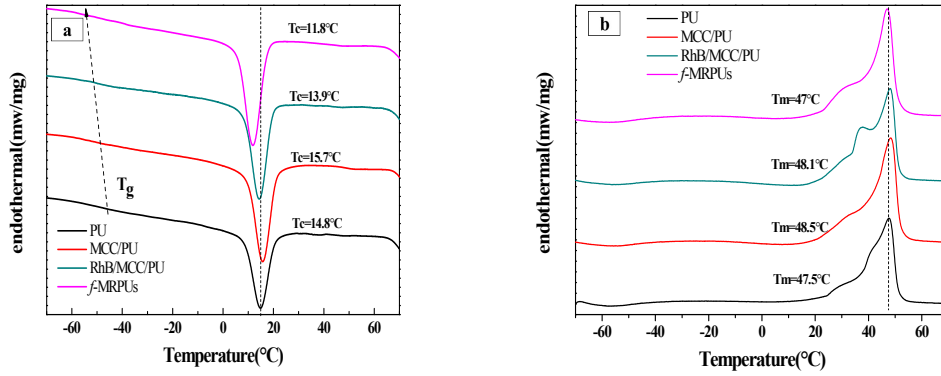

Fig. S3. DSC curves of PU composites: (a) cooling scan and (b) heating scan.

Table S2. DSC data of neat PU and PU composites

| Sample     | $T_g$ (°C) | $T_c$ (°C) | $\Delta H_{cc}$ (J/g) | $T_m$ (°C) | $\Delta H_m$ (J/g) |
|------------|------------|------------|-----------------------|------------|--------------------|
| PU         | -47.5      | 14.8       | 16.58                 | 47.5       | 24.96              |
| MCC/PU     | -44.3      | 15.7       | 19.61                 | 48.5       | 30.76              |
| RhB/MCC/PU | -49.2      | 13.9       | 20.68                 | 48.1       | 31.96              |
| f-MRPUs    | -50.6      | 11.8       | 24.66                 | 47.0       | 32.82              |

*Before shape memory test*

*After shape memory test*

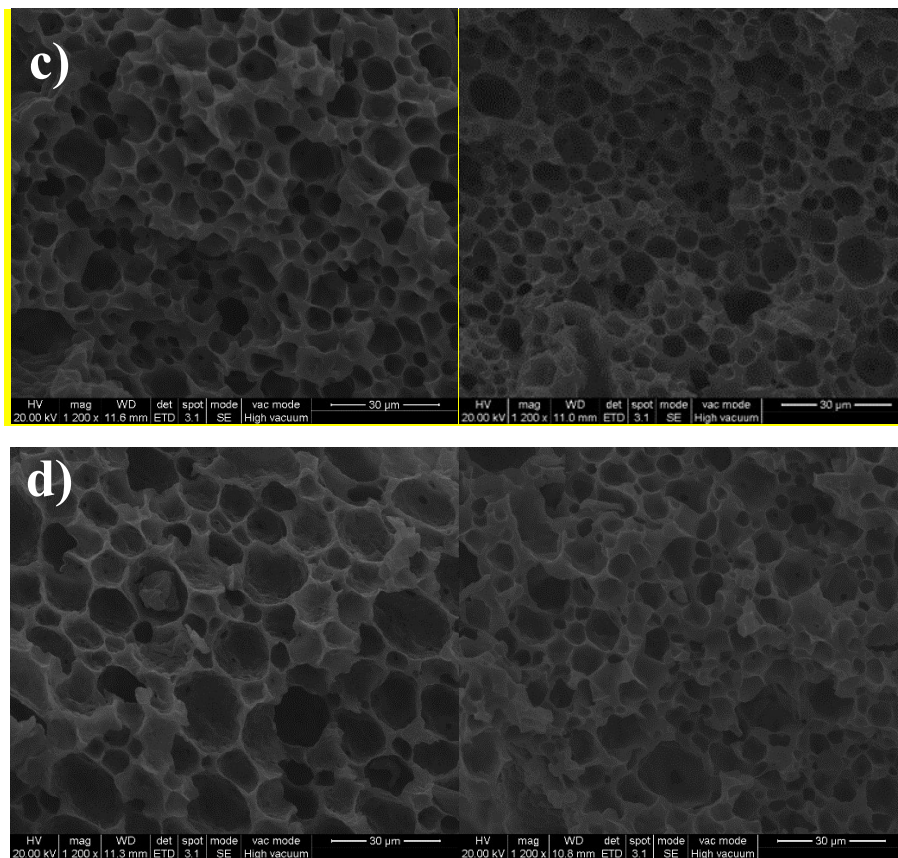

Fig S4. Morphologies of PU and its composites: (a) PU (b) MCC/PU

UV picture

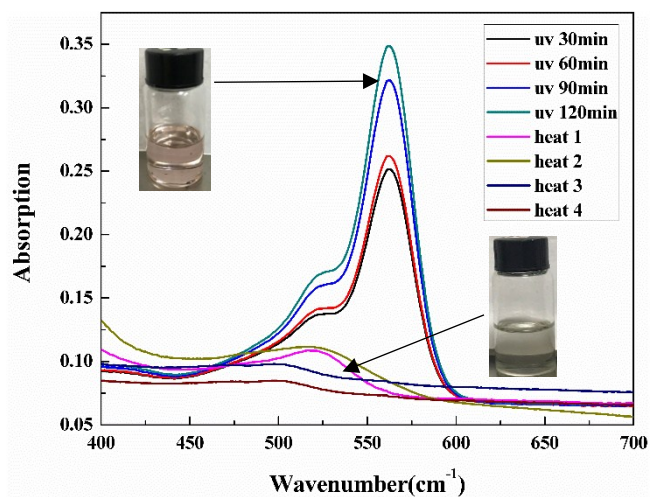

Fig. S5. UV curves of RhB/PU Film

(a) PU/RhB

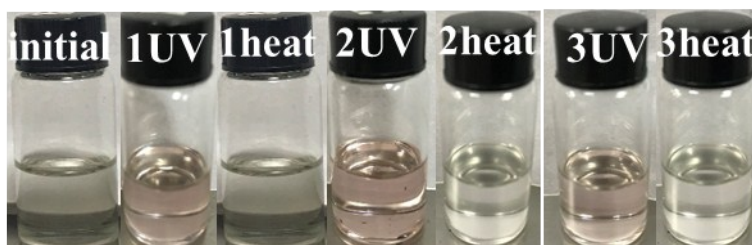

(b) *f*-MRPUs

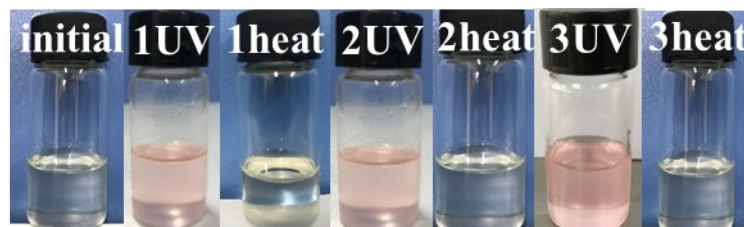

Fig. S6. UV/Heat responsive behavior of (a) RhB/PU and (b) *f*-MRPUs suspended in NMP
